# Supplementary material for: Multiple functional SNPs in differentially expressed genes modify risk and survival of non-small cell lung cancer in chinese female non-smokers
Source: PubMed Central journal article supplement (PMC5386658; doi:10.18632/oncotarget.14836), 2017-01-27
Supplement: oncotarget-08-18924-s001.pdf [file oncotarget-08-18924-s001.pdf]

# Multiple functional SNPs in differentially expressed genes modify risk and survival of non-small cell lung cancer in chinese female non-smokers

## Supplementary Materials

**Supplementary Table 1: Distribution of genotypes and ORs for different types of NSCLC and controls**

| SNP             | Genotype | Controls (%)<br>N = 395 | Adenocarcinoma<br>(%) N = 322 | Adjusted OR <sup>a</sup> | 95% CI      | P      | Squamous cell carcinoma<br>N = 66 | Adjusted OR <sup>a</sup> | 95% CI      | P      |
|-----------------|----------|-------------------------|-------------------------------|--------------------------|-------------|--------|-----------------------------------|--------------------------|-------------|--------|
| Rs4754          | CC       | 183 (46.3)              | 163 (50.6)                    | Ref                      |             |        | 42 (63.6)                         | Ref                      |             |        |
|                 | CT       | 167 (42.3)              | 136 (42.2)                    | 0.915                    | 0.671,1.246 | 0.572  | 20 (30.3)                         | 0.526                    | 0.297,0.933 | 0.028* |
|                 | TT       | 45 (11.4)               | 23 (7.1)                      | 0.566                    | 0.328,0.978 | 0.042* | 4 (6.1)                           | 0.383                    | 0.130,1.124 | 0.081  |
| Dominant model  |          |                         |                               | 0.842                    | 0.627,1.130 | 0.252  |                                   | 0.495                    | 0.289,0.849 | 0.011* |
| Recessive model |          |                         |                               | 0.597                    | 0.353,1.011 | 0.055  |                                   | 0.494                    | 0.171,1.424 | 0.191  |
| Additive model  | T allele |                         |                               | 0.817                    | 0.651,1.025 | 0.080  |                                   | 0.558                    | 0.358,0.869 | 0.010* |
| Rs959173        | TT       | 348 (88.1)              | 295 (91.6)                    | Ref                      |             |        | 64 (97.0)                         | Ref                      |             |        |
|                 | TC+CC    | 47 (11.9)               | 27 (8.4)                      | 0.678                    | 0.412,1.115 | 0.126  | 2 (3.0)                           | 0.238                    | 0.056,1.003 | 0.051  |
| Additive model  | C allele |                         |                               | 0.702                    | 0.435,1.133 | 0.148  |                                   | 0.239                    | 0.057,0.996 | 0.049* |
| Rs2069837       | AA       | 264 (66.8)              | 211 (65.5)                    | Ref                      |             |        | 40 (60.6)                         | Ref                      |             |        |
|                 | AG       | 120 (30.4)              | 96 (29.8)                     | 1.001                    | 0.724,1.384 | 0.994  | 22 (33.3)                         | 1.213                    | 0.690,2.130 | 0.503  |
|                 | GG       | 11 (2.8)                | 15 (4.7)                      | 1.705                    | 0.767,3.792 | 0.190  | 4 (6.1)                           | 2.356                    | 0.714,7.774 | 0.159  |
| Dominant model  |          |                         |                               | 1.061                    | 0.777,1.448 | 0.710  |                                   | 1.311                    | 0.767,2.243 | 0.322  |
| Recessive model |          |                         |                               | 1.705                    | 0.772,3.766 | 0.187  |                                   | 2.220                    | 0.684,7.201 | 0.184  |
| Additive model  | G allele |                         |                               | 1.110                    | 0.851,1.449 | 0.441  |                                   | 1.341                    | 0.859,2.095 | 0.197  |
| Rs2066992       | TT       | 201 (50.9)              | 150 (46.6)                    | Ref                      |             |        | 28 (42.4)                         | Ref                      |             |        |
|                 | TG       | 159 (40.3)              | 137 (42.5)                    | 1.154                    | 0.845,1.576 | 0.369  | 30 (45.5)                         | 1.357                    | 0.778,2.365 | 0.282  |
|                 | GG       | 35 (8.9)                | 35 (10.9)                     | 1.361                    | 0.813,2.279 | 0.241  | 8 (12.1)                          | 1.571                    | 0.660,3.742 | 0.307  |
| Dominant model  |          |                         |                               | 1.190                    | 0.886,1.599 | 0.247  |                                   | 1.403                    | 0.828,2.376 | 0.208  |
| Recessive model |          |                         |                               | 1.256                    | 0.767,2.058 | 0.365  |                                   | 1.389                    | 0.612,3.150 | 0.432  |
| Additive model  | G allele |                         |                               | 1.162                    | 0.972,1.457 | 0.193  |                                   | 1.303                    | 0.882,1.924 | 0.184  |
| Rs2239144       | GG       | 169 (42.8)              | 105 (32.6)                    | Ref                      |             |        | 18 (27.3)                         | Ref                      |             |        |
|                 | GT       | 171 (43.3)              | 147 (45.7)                    | 1.384                    | 0.996,1.922 | 0.053  | 32 (48.5)                         | 1.734                    | 0.933,3.223 | 0.082  |
|                 | TT       | 55 (13.9)               | 70 (21.7)                     | 2.063                    | 1.342,3.171 | 0.001* | 16 (24.2)                         | 2.730                    | 1.302,5.723 | 0.008* |
| Dominant model  |          |                         |                               | 1.548                    | 1.139,2.103 | 0.005* |                                   | 1.989                    | 1.116,3.543 | 0.020* |
| Recessive model |          |                         |                               | 1.721                    | 1.166,2.540 | 0.006* |                                   | 1.992                    | 1.059,3.747 | 0.033* |
| Additive model  | T allele |                         |                               | 1.458                    | 1.178,1.804 | 0.001* |                                   | 1.705                    | 1.176,2.472 | 0.005* |
| Rs7306706       | GG       | 154 (39.0)              | 137 (42.5)                    | Ref                      |             |        | 27 (40.9)                         | Ref                      |             |        |
|                 | GA       | 171 (43.3)              | 139 (43.2)                    | 0.920                    | 0.667,1.268 | 0.610  | 33 (50.0)                         | 1.109                    | 0.637,1.929 | 0.715  |
|                 | AA       | 70 (17.7)               | 46 (14.3)                     | 0.727                    | 0.470,1.125 | 0.152  | 6 (9.1)                           | 0.484                    | 0.191,1.226 | 0.126  |
| Dominant model  |          |                         |                               | 0.862                    | 0.639,1.163 | 0.332  |                                   | 0.922                    | 0.542,1.568 | 0.764  |
| Recessive model |          |                         |                               | 0.761                    | 0.508,1.139 | 0.185  |                                   | 0.451                    | 0.187,1.086 | 0.076  |
| Additive model  | A allele |                         |                               | 0.857                    | 0.691,1.062 | 0.159  |                                   | 0.789                    | 0.536,1.163 | 0.232  |
| Rs3181385       | TT       | 355 (89.9)              | 272 (84.5)                    | Ref                      |             |        | 60 (90.9)                         | Ref                      |             |        |
|                 | TC + CC  | 40 (10.1)               | 50 (15.5)                     | 1.771                    | 1.125,2.789 | 0.014* | 6 (9.1)                           | 0.945                    | 0.382,2.339 | 0.902  |
| Additive model  | A allele |                         |                               | 1.464                    | 0.960,2.232 | 0.076  |                                   | 0.823                    | 0.343,1.974 | 0.662  |
| Rs423490        | GG       | 323 (81.8)              | 274 (85.1)                    | Ref                      |             |        | 59 (89.4)                         | Ref                      |             |        |
|                 | GA + AA  | 72 (18.2)               | 48 (14.9)                     | 0.786                    | 0.527,1.171 | 0.237  | 7 (10.6)                          | 0.540                    | 0.237,1.232 | 0.143  |
| Additive model  | A allele |                         |                               | 0.809                    | 0.554,1.180 | 0.271  |                                   | 0.550                    | 0.247,1.222 | 0.142  |
